# Supplementary material for: Hospitalisations and deaths due to Ambulatory Care Sensitive Conditions (ACSC) among adults with and without Intellectual Disabilities in Scotland
Source: bioRxiv or medRxiv preprint supplement (doi:10.1101/2024.02.22.24303205), 2024-02-23
Supplement: Supplementary file [file media-1.pdf]

# Appendix

Table A1. All adult hospitalisation spells\* broken down by whether they were unplanned hospitalisations due to ACSC, by ID status, 2011-19 (%)

|       | ACSC hospitalisation |     | Total | N       |
|-------|----------------------|-----|-------|---------|
|       | No                   | Yes |       |         |
| No ID | 94.8                 | 5.2 | 100   | 579,917 |
| ID    | 94.8                 | 5.2 | 100   | 17,276  |

\* A continuous inpatient (CIP) spell is a continuous period of care within the NHS, regardless of any transfers which may take place.

Table A2. Incidence rates of adult hospitalisations due to an ACSC per 1,000 person-years, by ID status and ACSC, 2011-19 (sorted by decreasing SIR in ID group)

| ACSC                             | Crude incidence rates |              |      |              | ID incidence rates age-sex standardized to 'No ID' population |              |
|----------------------------------|-----------------------|--------------|------|--------------|---------------------------------------------------------------|--------------|
|                                  | No ID                 |              | ID   |              | SIR                                                           | SIR 95% CI   |
|                                  | IR                    | IR 95% CI    | IR   | IR 95% CI    |                                                               |              |
| Any ACSC                         | 6.07                  | (6.00, 6.14) | 6.10 | (5.71, 6.51) | 5.94                                                          | (5.56, 6.35) |
| Convulsions and Epilepsy         | 1.17                  | (1.14, 1.20) | 1.33 | (1.15, 1.53) | 1.36                                                          | (1.18, 1.57) |
| COPD                             | 1.17                  | (1.14, 1.20) | 1.23 | (1.06, 1.43) | 1.21                                                          | (1.04, 1.40) |
| Influenza and Pneumonia          | 0.90                  | (0.87, 0.92) | 0.99 | (0.84, 1.17) | 0.98                                                          | (0.83, 1.15) |
| Cellulitis                       | 0.50                  | (0.48, 0.52) | 0.41 | (0.32, 0.53) | 0.43                                                          | (0.33, 0.55) |
| Asthma                           | 0.41                  | (0.39, 0.43) | 0.42 | (0.33, 0.55) | 0.39                                                          | (0.30, 0.51) |
| Ear, nose, and throat infections | 0.37                  | (0.35, 0.39) | 0.39 | (0.30, 0.51) | 0.37                                                          | (0.29, 0.49) |

|                                 |      |              |       |               |       |               |
|---------------------------------|------|--------------|-------|---------------|-------|---------------|
| Congestive Heart Failure        | 0.43 | (0.41, 0.45) | 0.39  | (0.30, 0.51)  | 0.36  | (0.27, 0.47)  |
| Diabetes complications          | 0.44 | (0.42, 0.46) | 0.29  | (0.22, 0.40)  | 0.26  | (0.19, 0.36)  |
| Dehydration and Gastroenteritis | 0.24 | (0.22, 0.25) | 0.27  | (0.20, 0.37)  | 0.25  | (0.18, 0.35)  |
| Angina                          | 0.26 | (0.24, 0.27) | 0.28  | (0.20, 0.38)  | 0.24  | (0.17, 0.34)  |
| Pyelonephritis                  | 0.11 | (0.10, 0.12) | 0.13u | (0.08, 0.21)u | 0.13u | (0.08, 0.20)u |
| Iron deficiency anaemia         | 0.10 | (0.09, 0.11) | 0.08u | (0.05, 0.15)u | 0.07u | (0.04, 0.13)u |
| Perforated/bleeding ulcer       | 0.04 | (0.03, 0.04) | 0.05u | (0.02, 0.10)u | 0.06u | (0.03, 0.11)u |
| Gangrene                        | 0.07 | (0.07, 0.08) | 0.05u | (0.02, 0.10)u | 0.04u | (0.02, 0.10)u |
| Hypertension                    | 0.05 | (0.04, 0.06) | 0.03u | (0.01, 0.08)u | 0.04u | (0.02, 0.09)u |
| Dental conditions               | 0.06 | (0.05, 0.07) | 0.03u | (0.01, 0.08)u | 0.03u | (0.01, 0.08)u |
| Pelvic Inflammatory Disease     | 0.03 | (0.02, 0.03) |       |               |       |               |
| Other Vaccine Preventable       | 0.01 | (0.01, 0.02) |       |               |       |               |
| Nutritional deficiencies        |      |              |       |               |       |               |

Note: letter 'u' indicates that the figure may not be reliable due to the small number of cases (between 5-20).

Table A3. Average length of unplanned hospital stay due to ACSC, by ID status and ACSC, 2011-19 (measured in days; stays of adults on Census 2011 day; length refers to hospital spells. Sorted by decreasing mean length of stay in the ID group)

| ACSC     | No ID            |        |      | ID               |        |      |
|----------|------------------|--------|------|------------------|--------|------|
|          | Number of spells | median | mean | Number of spells | median | mean |
| Any ACSC | 30690*           | 1.0    | 2.5  | 924              | 1.0    | 2.6  |

|                                  |      |     |     |     |     |      |
|----------------------------------|------|-----|-----|-----|-----|------|
| Dental conditions                | 298  | 1.0 | 1.7 | 5   | 1.0 | 13.0 |
| Gangrene                         | 351  | 3.0 | 7.8 | 7   | 4.0 | 4.7  |
| Influenza and Pneumonia          | 4342 | 1.0 | 3.2 | 143 | 1.0 | 3.8  |
| Cellulitis                       | 2395 | 1.0 | 3.1 | 59  | 1.0 | 3.7  |
| Perforated/bleeding ulcer        | 187  | 1.0 | 2.4 | 7   | 2.0 | 3.4  |
| Diabetes complications           | 2133 | 1.0 | 3.4 | 42  | 1.0 | 3.3  |
| COPD                             | 5663 | 1.0 | 2.5 | 177 | 1.0 | 2.9  |
| Congestive Heart Failure         | 2061 | 1.0 | 3.3 | 56  | 1.0 | 2.4  |
| Dehydration and Gastroenteritis  | 1147 | 1.0 | 3.2 | 39  | 1.0 | 2.1  |
| Pyelonephritis                   | 521  | 2.0 | 2.3 | 19  | 1.0 | 1.9  |
| Convulsions and Epilepsy         | 5669 | 1.0 | 1.7 | 191 | 1.0 | 1.8  |
| Angina                           | 1245 | 1.0 | 1.3 | 40  | 1.0 | 1.6  |
| Ear, nose, and throat infections | 1794 | 1.0 | 1.2 | 56  | 1.0 | 1.4  |
| Asthma                           | 1986 | 1.0 | 1.4 | 61  | 1.0 | 1.2  |
| Iron deficiency anaemia          | 477  | 1.0 | 1.9 | 12  | 0.0 | 0.8  |
| Hypertension                     | 238  | 1.0 | 1.4 | 5   | 0.0 | 0.4  |
| Other Vaccine Preventable        | 57   | 1.0 | 2.2 | <5  |     |      |
| Pelvic Inflammatory Disease      | 126  | 2.0 | 3.1 | <5  |     |      |
| Nutritional deficiencies         | <5   |     |     | <5  |     |      |

\* rounded to the nearest 5 to avoid disclosure on the number of Nutritional Deficiencies spells.

Table A4. Adult ACSC mortality rates per 1,000 person-years, by ID status and 'main-cause of death' status, 2011-19 (sorted by decreasing main-cause SMR in ID group)

| ACSC                            | Main-cause           |              |                   |              |                                                                    |              | All-cause            |              |                   |              |                                                                    |              |
|---------------------------------|----------------------|--------------|-------------------|--------------|--------------------------------------------------------------------|--------------|----------------------|--------------|-------------------|--------------|--------------------------------------------------------------------|--------------|
|                                 | Crude mortality rate |              |                   |              | ID mortality rate<br>age-sex standardized<br>to 'No ID' population |              | Crude mortality rate |              |                   |              | ID mortality rate<br>age-sex standardized<br>to 'No ID' population |              |
|                                 | No ID                |              | ID                |              |                                                                    |              | No ID                |              | ID                |              |                                                                    |              |
|                                 | CMR                  | CMR 95% CI   | CMR               | CMR 95% CI   | SMR                                                                | SMR 95% CI   | CMR                  | CMR 95% CI   | CMR               | CMR 95% CI   | SMR                                                                | SMR 95% CI   |
| Any ACSC                        | 1.03                 | (1.00, 1.06) | 1.67              | (1.47, 1.90) | 2.62                                                               | (2.36, 2.91) | 3.90                 | (3.84, 3.95) | 5.66              | (5.27, 6.08) | 8.79                                                               | (8.30, 9.30) |
| COPD                            | 0.80                 | (0.78, 0.83) | 0.57              | (0.46, 0.71) | 1.06                                                               | (0.90, 1.25) | 1.73                 | (1.70, 1.77) | 1.16              | (1.00, 1.36) | 2.12                                                               | (1.88, 2.38) |
| Convulsions and Epilepsy        | 0.02                 | (0.02, 0.02) | 0.69              | (0.56, 0.85) | 0.79                                                               | (0.65, 0.95) | 0.10                 | (0.09, 0.11) | 2.36              | (2.11, 2.63) | 2.76                                                               | (2.49, 3.06) |
| Asthma                          | 0.03                 | (0.02, 0.03) | 0.10 <sub>u</sub> | (0.06, 0.17) | 0.17 <sub>u</sub>                                                  | (0.12, 0.26) | 0.09                 | (0.08, 0.10) | 0.23              | (0.16, 0.33) | 0.39                                                               | (0.30, 0.52) |
| Hypertension                    | 0.03                 | (0.03, 0.04) | 0.06 <sub>u</sub> | (0.03, 0.12) | 0.14 <sub>u</sub>                                                  | (0.09, 0.22) | 1.15                 | (1.12, 1.18) | 0.76              | (0.63, 0.93) | 1.56                                                               | (1.36, 1.78) |
| Congestive Heart Failure        | 0.08                 | (0.07, 0.09) | 0.07 <sub>u</sub> | (0.04, 0.14) | 0.13 <sub>u</sub>                                                  | (0.09, 0.21) | 1.15                 | (1.12, 1.18) | 1.25              | (1.08, 1.46) | 2.18                                                               | (1.94, 2.44) |
| Influenza and Pneumonia         | 0.03                 | (0.02, 0.03) | 0.07 <sub>u</sub> | (0.04, 0.14) | 0.12 <sub>u</sub>                                                  | (0.07, 0.20) | 0.04                 | (0.03, 0.04) | 0.08 <sub>u</sub> | (0.05, 0.15) | 0.13 <sub>u</sub>                                                  | (0.08, 0.20) |
| Cellulitis                      | 0.02                 | (0.02, 0.03) | 0.04 <sub>u</sub> | (0.02, 0.09) | 0.08 <sub>u</sub>                                                  | (0.04, 0.15) | 0.05                 | (0.04, 0.05) | 0.09 <sub>u</sub> | (0.05, 0.16) | 0.16 <sub>u</sub>                                                  | (0.10, 0.24) |
| Pyelonephritis                  | 0.01                 | (0.00, 0.01) | 0.04 <sub>u</sub> | (0.02, 0.09) | 0.06 <sub>u</sub>                                                  | (0.03, 0.13) | 0.01                 | (0.01, 0.01) | 0.08 <sub>u</sub> | (0.05, 0.15) | 0.12 <sub>u</sub>                                                  | (0.07, 0.20) |
| Dehydration and Gastroenteritis | 0.01                 | (0.00, 0.01) |                   |              |                                                                    |              | 0.03                 | (0.03, 0.04) | 0.12 <sub>u</sub> | (0.07, 0.19) | 0.27 <sub>u</sub>                                                  | (0.20, 0.38) |
| Angina                          | 0.00 <sub>u</sub>    | (0.00, 0.00) |                   |              |                                                                    |              | 0.03                 | (0.02, 0.03) |                   |              |                                                                    |              |
| Gangrene                        |                      |              |                   |              |                                                                    |              | 0.02                 | (0.01, 0.02) | 0.04 <sub>u</sub> | (0.02, 0.09) | 0.06 <sub>u</sub>                                                  | (0.03, 0.13) |
| Pelvic Inflammatory Disease     |                      |              |                   |              |                                                                    |              | 0.00 <sub>u</sub>    | (0.00, 0.00) |                   |              |                                                                    |              |
| Nutritional Deficiencies        |                      |              |                   |              |                                                                    |              | 0.00 <sub>u</sub>    | (0.00, 0.00) |                   |              |                                                                    |              |
| Ear, nose and throat infections |                      |              |                   |              |                                                                    |              | 0.00 <sub>u</sub>    | (0.00, 0.00) |                   |              |                                                                    |              |
| Dental conditions               |                      |              |                   |              |                                                                    |              | 0.00 <sub>u</sub>    | (0.00, 0.00) |                   |              |                                                                    |              |
| Iron deficiency anaemia         |                      |              |                   |              |                                                                    |              |                      |              |                   |              |                                                                    |              |
| Other Vaccine Preventable       |                      |              |                   |              |                                                                    |              |                      |              |                   |              |                                                                    |              |
| Perforated/bleeding ulcer       |                      |              |                   |              |                                                                    |              |                      |              |                   |              |                                                                    |              |
| Diabetes Complications          |                      |              |                   |              |                                                                    |              |                      |              |                   |              |                                                                    |              |

Note: letter 'u' indicates that the figure may not be reliable due to the small number of cases (between 5-20).
